# Supplementary material
Source: PubMed Central journal article supplement (PMC4351474)
Supplement: NIHMS662952-supplement-1.pdf [file NIHMS662952-supplement-1.pdf]

## **Inventory of Supplemental Materials**

Figure S1, related to Figure 1

Figure S2, related to Figures 2 and 3

Figure S3, related to Figure 4

Figure S4, related to Figure 7

Figure S5, summary schematic

Supplemental Experimental Procedures
